# Supplementary material
Source: Springer Nature journal article supplement (https://www.springermedizin.de/resource/supplementary/13051_2011_220_MOESM4_ESM.pdf/9670188)

A.

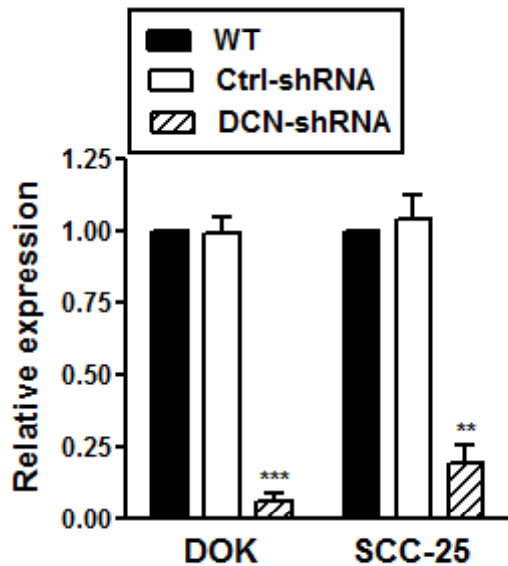

B.

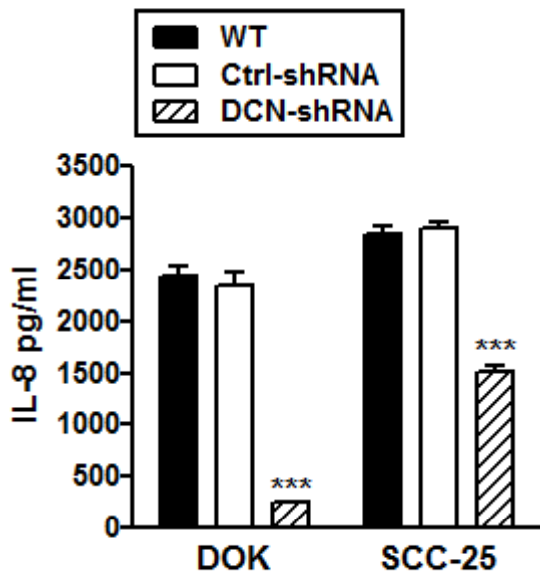

Supplement: MOESM4 [file 9670188]
